# Supplementary material for: Spatial Distribution of Fungal Communities in an Arable Soil
Source: PubMed Central journal article supplement (PMC4740416; doi:10.1371/journal.pone.0148130), 2016-02-03

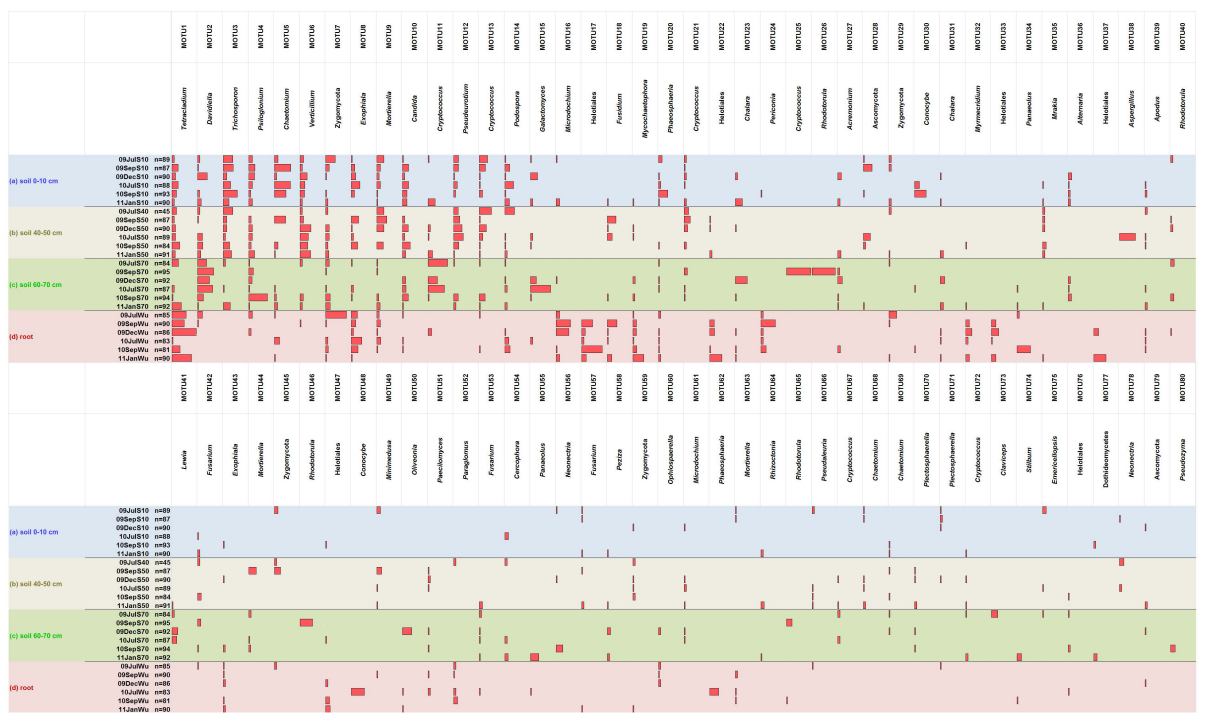

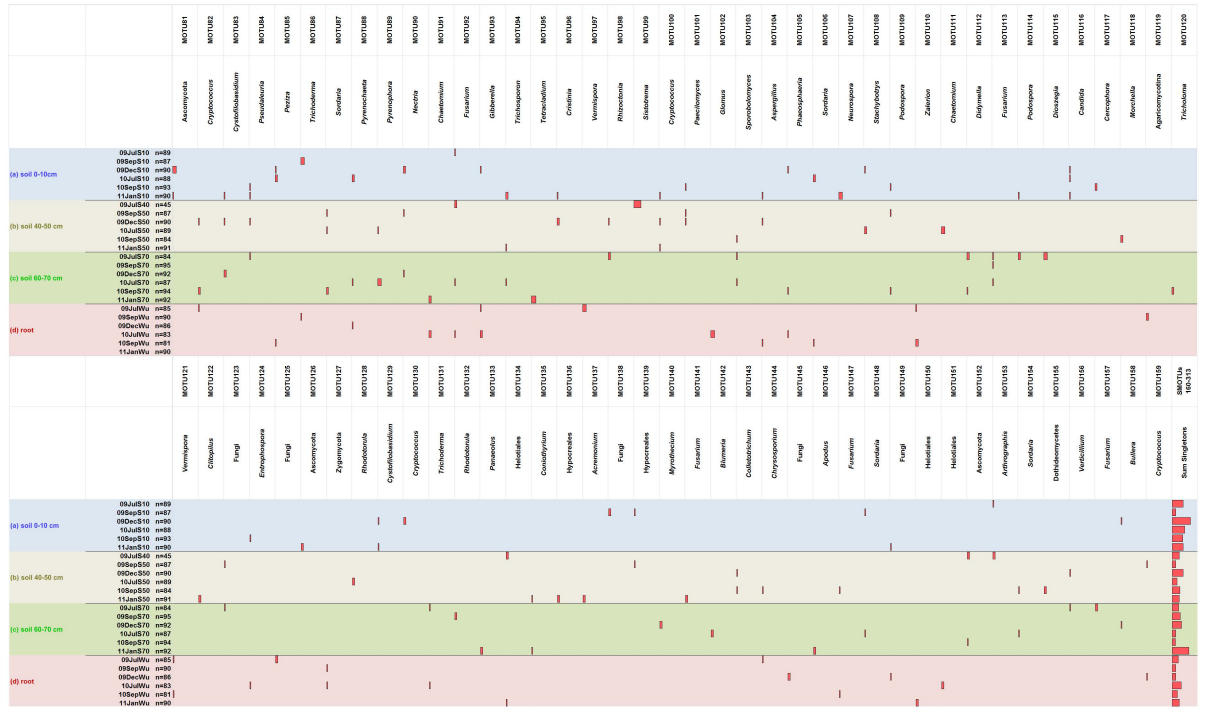

Supplement: pone.0148130.s004.pdf [file pone.0148130.s004.pdf]
