# Supplementary material for: Spatial Distribution of Fungal Communities in an Arable Soil
Source: PubMed Central journal article supplement (PMC4740416; doi:10.1371/journal.pone.0148130), 2016-02-03
Supplement: pone.0148130.s006.pdf [file pone.0148130.s006.pdf]

**S1 Table. Soil properties of the field site from (Moll et al. 2015)**

| Horizon # | Depth [cm] | Bd [g cm <sup>-3</sup> ] | clay/silt/sand % (w/w) | pH (CaCl <sub>2</sub> ) | C <sub>org</sub> [g kg <sup>-1</sup> ] | Total N [g kg <sup>-1</sup> ] | C/N | EOC * [μg g <sup>-1</sup> ] |
|-----------|------------|--------------------------|------------------------|-------------------------|----------------------------------------|-------------------------------|-----|-----------------------------|
| Ap1       | 0-25       | 1.4±0.0                  | 7.0/87.2/5.8           | 6.0±0.1                 | 12.4±0.4                               | 1.3±0.0                       | 9.8 | 23.2±0.9                    |
| Ap2       | 25-37      | 1.6±0.0                  | 7.1/87.8/5.0           | 6.2±0.1                 | 6.9±1.2                                | 0.8±0.1                       | 9.2 | 17.2±0.7                    |
| Btw1      | 37-65      | 1.7±0.0                  | 7.1/87.7/5.1           | 6.6±0.1                 | 3.3±0.5                                | 0.4±0.0                       | 8.9 |                             |
| Btw2      | > 65       | 1.6±0.0                  | 6.8/88.4/4.8           | 7.0±0.1                 | 1.8±0.4                                | 0.3±0.0                       | 6.9 | 7.8±0.8                     |

bd: bulk density; EOC: extractable organic carbon; # Classification according to KA5 (Ad-hoc-Arbeitsgruppe-Boden 2005); \* values measured in 0-10 cm, 30-40 cm and 60-70 cm soil depth.

## References

- Ad-hoc-Arbeitsgruppe-Boden (2005). KA 5 (Bodenkundliche Kartieranleitung). Stuttgart, Germany, E. Schweizerbart'sche Verlagsbuchhandlung.
- Moll, J, Goldmann, K, Kramer, S, Hempel, S, Kandeler, E, Marhan, S, Ruess, L, Krüger, D, Buscot, F (2015). "Resource type and availability regulate fungal communities along arable soil profiles." *Microb Ecol*: 1-10.
